# Supplementary material
Source: PubMed Central journal article supplement (PMC3547471)
Supplement: cn300095t_si_001.pdf [file cn300095t_si_001.pdf]

**5-HT<sub>4</sub> RECEPTORS CONSTITUTIVELY PROMOTE  
THE NON-AMYLOIDOGENIC PATHWAY OF APP CLEAVAGE  
AND INTERACT WITH ADAM10**

**Maud Cochet, Romain Donneger, Elisabeth Cassier, Florence Gaven, Stefan F. Lichtenthaler,  
Philippe Marin, Joël Bockaert, Aline Dumuis\* and Sylvie Claeysen\***

CONTENTS:

**SUPPLEMENTAL FIGURES**

**Supplemental Figure 1:** 5-HT<sub>4</sub>R variants (mouse a, b, e and f; human a, g and i), truncated forms ( $\Delta$ 358 and  $\Delta$ 329) and mutants (A<sup>258</sup>L, N<sup>308</sup>D and Y<sup>302</sup>F) promote sAPP release and physically interact with ADAM10.

**Supplemental Figure 2:** sAPP release induced by 5-HT<sub>4</sub>R expression is not affected by  $\beta$ - or  $\gamma$ -secretase inhibitors.

**SUPPLEMENTAL FIGURE LEGENDS**

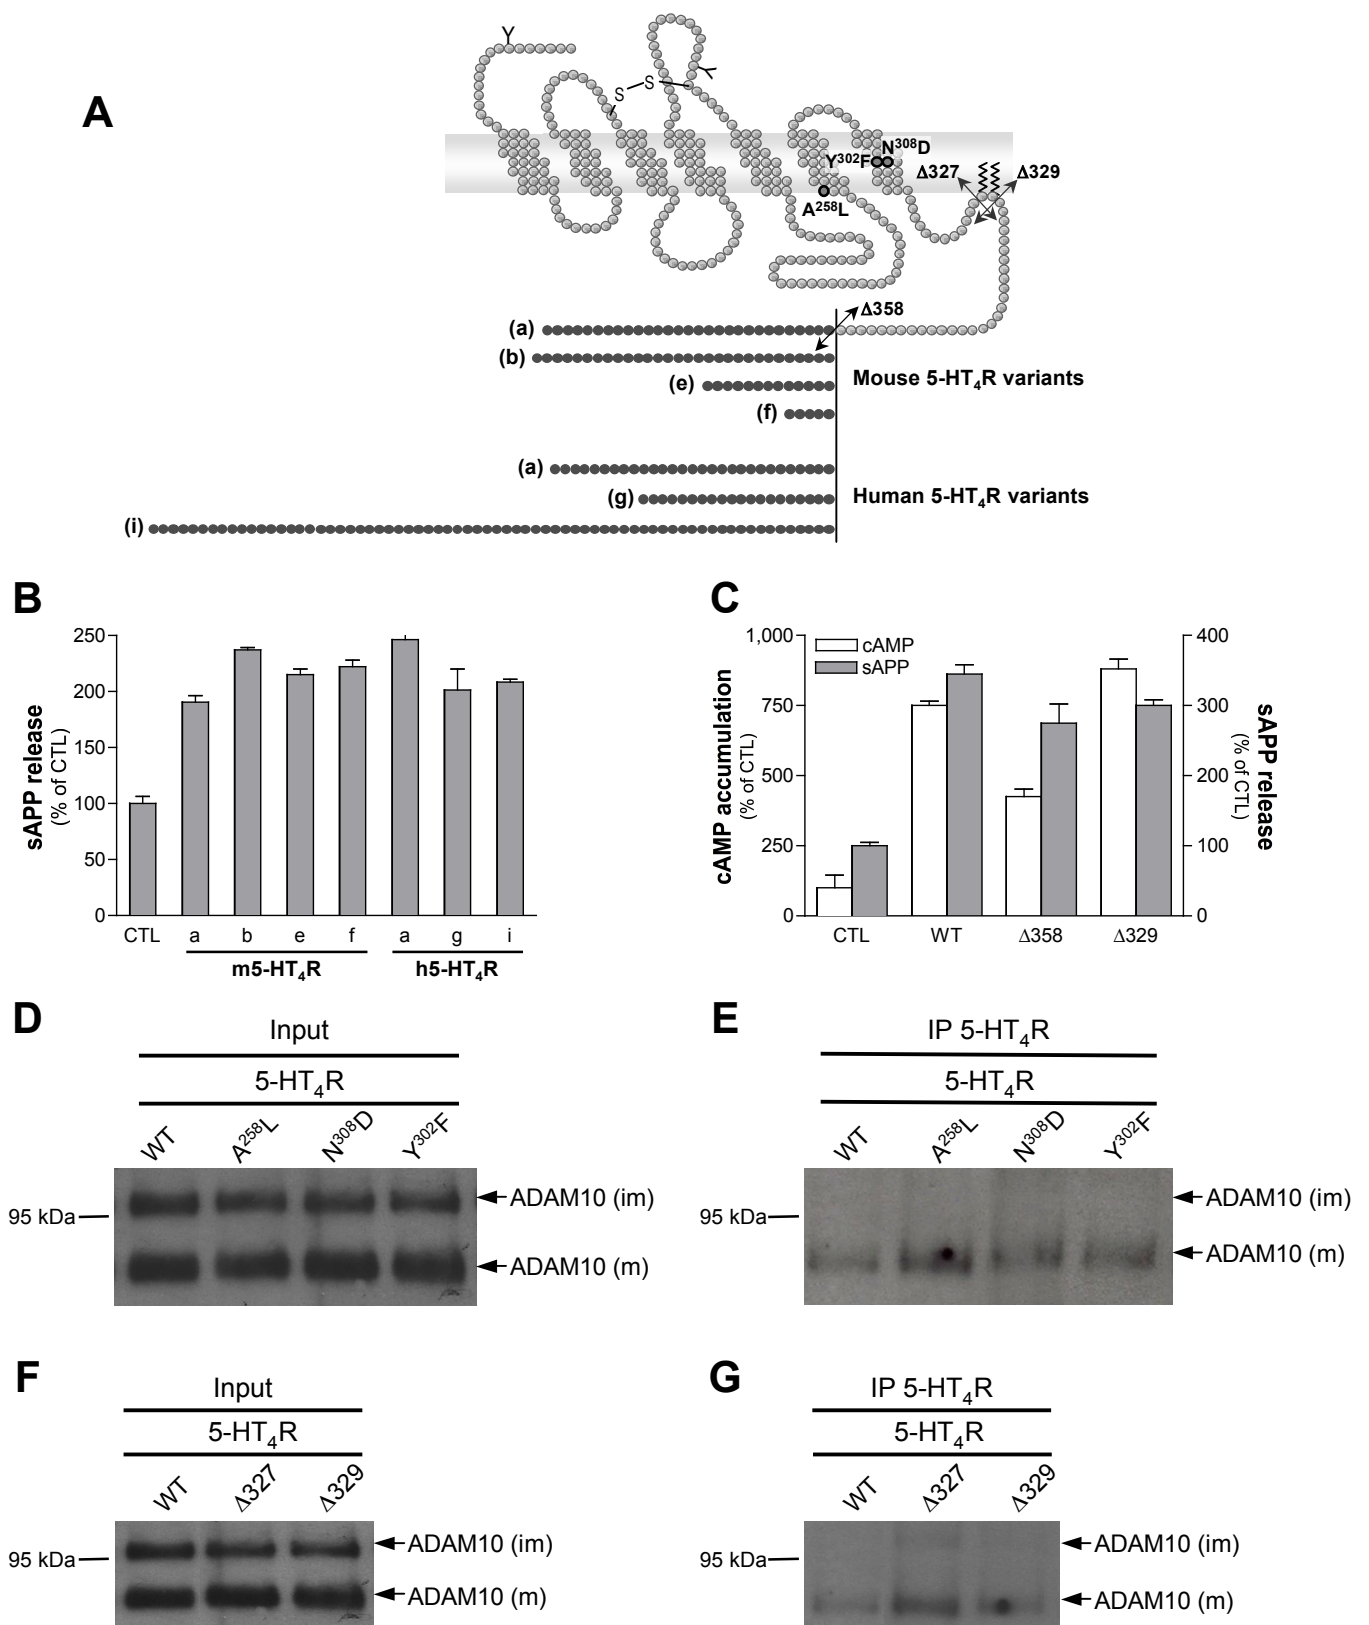

Supplemental Figure 1

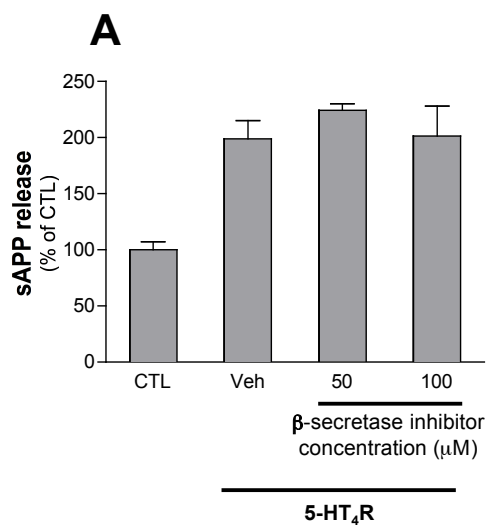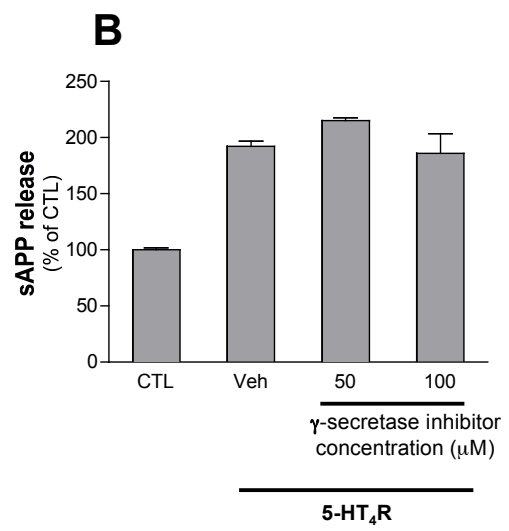

**Supplemental Figure 2**

## SUPPLEMENTAL FIGURE LEGENDS

**Supplemental Figure 1: 5-HT<sub>4</sub>R variants (mouse a, b, e and f; human a, g and i), truncated forms ( $\Delta$ 358 and  $\Delta$ 329) and mutants (A<sup>258</sup>L, N<sup>308</sup>D and Y<sup>302</sup>F) promote sAPP release and physically interact with ADAM10.**

*A*, Schematic representation of 5-HT<sub>4</sub>R variants and mutants. (*B-G*) HEK-293 cells were transiently transfected with the indicated plasmids encoding HA-tagged 5-HT<sub>4</sub>R variants, mutants or truncated forms (200 ng/10<sup>7</sup> cells). *B*, *C*, 24 hrs after transfection, cAMP accumulation and sAPP release (alkaline phosphate activity) were measured. Results are the means  $\pm$  SD of at least three independent experiments. *D-G*, Protein lysates were immunoprecipitated with the anti-HA antibody. Whole cell extracts and immunoprecipitated material were analysed by Western blotting using the anti-ADAM10 C-terminal antibody. The results are representative of three independent experiments performed with different sets of cultured cells.

**Supplemental Figure 2: sAPP release induced by 5-HT<sub>4</sub>R expression is not affected by  $\beta$ - or  $\gamma$ -secretase inhibitors.**

HEK-293 cells were transiently transfected with plasmids encoding Myc-tagged 5-HT<sub>4</sub>R (250 ng/10<sup>7</sup> cells) and SEAP-tagged APP (500 ng/10<sup>7</sup> cells). 24 hrs after transfection, cells were treated with vehicle alone or the indicated concentrations of a  $\beta$ -secretase (KTEEISEVN-statine-VAEF) (*A*) or a  $\gamma$ -secretase (L-685,458) (*B*) inhibitor for 2 hrs and sAPP release was evaluated by measuring the alkaline phosphatase activity. Data are the means  $\pm$  SD of at least three independent experiments.
